# Supplementary material for: Two new clavate Fragilariopsis and one new Rouxia diatom species with biostratigraphic and paleoenvironmental applications for the Pliocene-Pleistocene, East Antarctica
Source: Copernicus journal article supplement (doi:10.5194/jm-43-139-2024), 2024-06-12
Supplement: Supplementary file 1 [file jm-43-139-2024-supplement.zip]

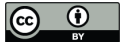

## *Supplement of*

# **Two new clavate *Fragilariopsis* and one new *Rouxia* diatom species with biostratigraphic and paleoenvironmental applications for the Pliocene-Pleistocene, East Antarctica**

Grace Duke et al.

Correspondence to: Grace Duke ([grace.duke93@gmail.com](mailto:grace.duke93@gmail.com))

- [jm-43-139-2024-supplement-title-page.pdf](#)
- [New\\_Taxa\\_manuscript\\_data.xlsx](#)

The copyright of individual parts of the supplement might differ from the article licence.
