# Supplementary material for: Two new clavate Fragilariopsis and one new Rouxia diatom species with biostratigraphic and paleoenvironmental applications for the Pliocene-Pleistocene, East Antarctica
Source: Copernicus journal article supplement (doi:10.5194/jm-43-139-2024), 2024-06-12
Supplement: Supplementary file 1 [file New_Taxa_manuscript_data.xlsx]

## Sheet: absolute abundance
			absolute abundance (valves/g * 10^-3)
Core id	depth CSF-B (m)	age	R. raggattensis	F. clava	F. clementia	F. heardensis	F. armandae	Total absolute abundance
4H3 82-84	31.83	1.7529	238.365	0	0			12567.1
4H4 2-4	32.53	1.79156	0		0			10728
4H4 25-27	32.76	1.80677	5.31593	0	0			3800.89
4H4 32-34	32.83	1.8114	0		0			14240.9
4H4 40-42	32.91	1.81669	0	0	0			4913.06
4H5 12-14	34.13	1.89738	0	0	0			5218.8
4H5 35-37	34.36	1.91259	0	0	0			6110.7
4H5 42-44	34.43	1.91722	0	0	0			5699.04
4H5 62-64	34.63	1.93045	0	0	0			5055.06
4H5 72-74	34.73	1.93706	0	0	0			6474.82
4H5 85-87	34.86	1.94378	0	0	0			5112.5
4H5 92-94	34.93	1.94739	0	0	0			5950.48
4H5 122-124	35.23	1.96132	0	0	0			5214.74
4H5 142-144	35.43	1.9699	0	0	0			5612.67
4H6 12-14	35.63	1.97849	0	0	0			5391.24
4H6 45-47	35.96	1.99266	0	0	0			5220.77
4H6 62-64	36.13	1.99996	0	0	0			5260.8
5H1 2-4	37.5285	2.06	7.21093	0	0			4771.23
5H1 72-74	38.2005	2.08885	26.5432	0	0			3709.42
5H2 102-104	39.9215	2.16274	486.625	0	0			4795.61
5H2 132-134	40.2075	2.17502	344.315	0	0			4929.96
5H2 145-147	40.3315	2.18034	93.441	0	0			5053.6
5H3 45-47	40.8115	2.20095	272.997	0	0			5524.18
5H3 52-54	40.8785	2.20383	345.874	0	0			4402.69
5H4 62-64	42.4145	2.26978	118.888	0	0			5357.88
5H5 12-14	43.3735	2.31095	127.08	0	0			5623.27
5H5 21-23	43.4595	2.31464	115.587	0	0			6081.67
5H5 32-34	43.5645	2.31915	96.0788	0	0			5581.3
5H5 132-134	44.5175	2.36007	127.247	0	0			5105.79
5H5 145-147	44.6415	2.36539	1361.99	0	0			5677.92
5H6 2-4	44.7085	2.36827	737.816	0	0			4858.59
5H6 12-14	44.8045	2.37239	2193.61		0			14859.3
5H6 21-23	44.8915	2.37613	1245.7	0	0			8790.19
5H6 32-34	44.9965	2.38063	3104.4		0			18626.4
5H6 45-47	45.1215	2.386	1077.8	0	0			3672.52
5H6 52-54	45.1885	2.38888	4017.67		0			27956.3
5H6 62-64	45.2845	2.393	1415.54	0	0			8790.05
5H6 72-74	45.3805	2.39712	1847.28		0			10827.1
5H6 82-84	45.4765	2.40124	1002.85	0	0			5818.14
5H6 142-144	46.0525	2.42597	410.175	0	0			6382.72
5H7 2-4	46.1485	2.43009	134.216	0	0			5123.88
5H7 15-17	46.2725	2.43542	425.816		0			10475.1
5H7 22-24	46.3395	2.43829	7.8713	0	0			4788.38
5H7 32-34	46.4345	2.44237	23.8117	0	0			5003.11
5HCC 12-14	46.8655	2.46088	651.608	0	0	0	0
5HCC 19-21	46.9325	2.46375	72.8619	0	0
6H1 12-14	47.1275	2.47213	445.869	0	0	30.8979	6.17958	5053.18
6H1 132-134	48.3035	2.52262	253.229	0	0	14.5865	4.16756	5199.11
6H1 142-144	48.4015	2.52682	297.978	0	0	2.30772	6.92315	5702.48
6H2 2-4	48.499	2.53101	182.805	0	0		8.37175
6H2 12-14	48.5965	2.5352	0	0	0
6H2 21-23	48.684	2.53895	0	0	0	10.4314	0	5067.79
6H2 32-34	48.791	2.54355	8.679	0	0	0	6.85671
6H2 42-44	48.8885	2.54773	26.3886	0	0	0	4.63278	5638.37
6H2 52-54	48.986	2.55192	15.8404	0	0
6H2 62-64	49.083	2.55608	47.4342	0	0	12.4903	0	5365.34
6H2 72-74	49.1805	2.56027	7.9142	0	0			5228.65
6H2 82-84	49.278	2.56446	39.465	0	0	0	4.15682
6H2 92-94	49.375	2.56862	17.8854	0	0	0	0	5890.25
6H2 102-104	49.4725	2.57281	0	0	0	0	0
6H2 112-114	49.57	2.57699	15.8653	0	0	0	8.35506	4622.09
6H3 32-34	50.25	2.59939	7.8699	0	0	0	0
6H3 102-104	50.9395	2.62078	15.7598	0	0			4706.91
6H4 21-23	51.614	2.6418	7.93107	0	0			4948.99
6H4 27-29	51.6725	2.64362	0	0	0	0	0
6H4 32-34	51.721	2.64513	7.90995	0	0
6H4 40-42	51.799	2.64757	0	0	0	0	0	4812.47
6H4 112-114	52.5	2.66941	316.72	0	0	0	0	5671.63
6H4 120-122	52.5775	2.67183	348.96	0	0	0	0	5067.85
6H4 142-144	52.792	2.67852	0	0	0	0	0	4365.14
6H5 2-4	52.8895	2.68155	0	0	0	0	0	4801.11
6H5 12-14	52.9875	2.68461	15.9739	0	0	0	0	4903.98
6H5 21-23	53.0755	2.68735	0	0	0			4951.06
6H5 27-29	53.1345	2.68919	81.5796		0			2861.33
6H5 32-34	53.1835	2.69072	8.02156	0	0			5526.85
6H5 122-124	54.0655	2.71821	15.7193	0	0	0	0	5100.91
6H5 130-132	54.144	2.72066	26.6454	0	0			5426.79
6H5 140-142	54.242	2.72371	15.688	0	0			4782.22
6H6 82-84	55.1405	2.75172	1858.46		0			6904.24
6H7 2-4	55.1995	2.75355	30.8968		0			1932.08
6H7 12-14	55.297	2.75659	163.783	0	0	0	0	3222.68
6H7 32-34	55.493	2.7627	641.294	0	0			3740.88
6H7 42-44	55.5905	2.76574	508.543	0	0			3736.45
6H7 52-54	55.6885	2.7688	40.1013	0	0			4884.34
6HCC 12-14	56.4145	2.79142	5.75363	0	0			2784.75
7H1 2-4	56.53	2.79502	176.721	0	0			8084.99
7H1 22-24	56.72	2.80095	0	0	0			6567.82
7H1 42-44	56.91	2.80687	132.541	0	0			5929.88
7H1 62-64	57.1	2.81263	0	19.2587	0			3699.31
7H1 72-74	57.19	2.81559	220.901	0	0			8541.51
7H1 92-94	57.38	2.82152	0	4.81716	0			10388.3
7H1 102-104	57.47	2.82432	0	9.71657	0			8287.24
7H1 112-114	57.57	2.82744	0	26.7654	0			7724.69
7H1 122-124	57.66	2.83024	88.3605	0	0			5911.03
7H1 142-144	57.85	2.83617	22.0901	0	0			4632.3
7H2 22-24	58.14	2.8452	0		0			7332.29
7H2 52-54	58.42	2.85393	44.1803		0			8992.76
7H2 82-84	58.705	2.86282	0		0			7491.49
7H2 92-94	58.8	2.86578	0		0			6513.34
7H2 122-124	59.08	2.8745	132.541		88.3605			4330.64
7H4 52-54	61.25	2.94214	220.901		0			28365.4
7H4 62-64	61.345	2.9451	375.532		88.3605			21731.2
7H4 72-74	61.44	2.94806	331.352		0			9411.27
7H4 82-84	61.54	2.95102	88.3605		0			5645.26
7H4 92-94	61.63	2.95398	220.901		0			6754.43
7H4 112-114	61.82	2.9599	44.1803		0			7750.67
7H4 132-134	62.01	2.96583	0		132.541			6080.19
7H5 2-4	62.2	2.97175	397.622		0			4934.06
7H5 22-24	62.39	2.97767	618.524		0			5130.95
7H5 32-34	62.48	2.98048	198.811		0			6033.96
7H6 52-54	64.09	3.03066	176.721		0			15159.4
7H6 62-64	64.185	3.0337	66.2704		0			13688.2
7H6 72-74	64.28	3.03681	176.721		0			17311
7H6 82-84	64.375	3.03992	88.3605		0			10227.2
7H6 92-94	64.47	3.04303	132.541		0			14415.4
7H6 102-104	64.56	3.04597	88.3605		0			11185.6
7H6 112-114	64.66	3.04924	110.451		0			11612.7
7H6 132-134	64.75	3.05219	132.541		0			10522.9
7H6 142-144	64.94	3.05841	574.343		0			7649.24
7H7 2-4	65.04	3.06168	242.991		0			6078.16
8H1 102-104	67.03	3.12201	0		0			647.899
8H3 72-74	69.74	3.17138	132.541		0			25897.9
8H3 82-84	69.84	3.17321	0		0			15082.5
8H3 102-104	70.04	3.17685	0		0			6498.15
8H5 32-34	72.35	3.22992	0		0			3988.08
8H5 52-54	72.55	3.23692	22.0901		0			10671.5
8H5 82-84	72.85	3.24742	0		0			12671.6
8H5 102-104	73.05	3.25442	176.721		0			6292.11
8H5 142-144	73.45	3.26841	88.3605		0			5912.21
9H1 32-34	75.81	3.40361	0		0			22428.5
9H1 42-44	75.91	3.41588	176.721		0			16888.4
9H1 52-54	76	3.42692	110.451		0			25785.6
9H1 62-64	76.1	3.43919	66.2704		242.991			18615.8
9H1 72-74	76.19	3.45023	44.1803		198.811			23540.2
9H1 82-84	76.29	3.4625	110.451		110.451			14982.8
9H1 102-104	76.48	3.48581	22.0901		0			12159.5
9H1 122-124	76.67	3.50912	0		0			31127.6
9H1 132-134	76.765	3.52078	44.1803		0			40424
9H1 142-144	76.86	3.53243	110.451		0			24268.5
9H2 2-4	76.96	3.5447	0		0			11599.4
9H2 22-24	77.15	3.56801	0		0			7564.85
9H2 42-44	77.34	3.59132	66.2704		0			11064.5
9H2 62-64	77.53	3.60042	0		0			17106.7
9H2 122-124	78.1	3.61703	0		0			7163.37
9H2 142-144	78.29	3.62256	154.631		0			5438.82
9H3 92-94	79.23	3.64994	110.451		0			49030.2
9H3 102-104	79.33	3.65286	88.3605		0			156334
9H3 112-114	79.425	3.65562	44.1803		0			41330
9H3 122-124	79.52	3.65839	110.451		0			77581.2
9H3 132-134	79.615	3.66116	22.0901		0			47877.5
9H3 142-144	79.71	3.66393	22.0901		0			45172.9
9H4 2-4	79.81	3.66684	66.2704		0			4551.04
9H6 82-84	83.42	3.772	66.2704		0			10289.3
9H6 122-124	83.8	3.78307	176.721		0			61458.4
9H6 132-134	83.895	3.78583	44.1803		0			40509.3
9H6 142-144	83.99	3.7886	176.721		0			27093.9

## Sheet: R. raggattensis morphometrics
	length (µm)	transapical width (µm)	diamond length (µm)	diamond raphe length (µm)	diamond width (µm)	needle length (µm)	needle raphe length (µm)	needle width	costae per 10 um	depth (CSF-B mbsf)	Sample id
average	145.55	3.95	21.04	18.06	6.6	21.66	19.09	4.88	13.42
min	120.37	3.13	17.54	14.43	5.09	17.78	15.31	3.44	12
max	201.54	5.24	26.14	22.27	8.18	25.82	23.02	7.05	15
# of samples	44	44	80	80	82	68	68	71	60
whole	136.084	4.035	21.329	17.503	7.426	21.378	18.451	5.9		39.9215	5H2_102-104
whole	142.232	3.717	22.777	19.738	6.554	24.783	21.806	4.363	13	44.8915	5H6_21-23
whole	148.781	3.25			7.417	22.327	19.709	4.494		44.8915	5H6_21-23
whole	138.612	3.709	20.722	17.554	7.19	20.15	17.987	4.702		44.8915	5H6_21-23
whole	142.599	3.277	21.863	19.605	5.843	22.398	20.337	4.283	13	44.8915	5H6_21-23
whole	131.527	3.336	20.871	18.357	7.561	23.063	18.951	5.033	13	44.8915	5H6_21-23
whole	129.753	3.492	21.789	18.575	8.177	22.861	20.656	5.746	13	44.8915	5H6_21-23
whole	139.026	4.035	21.773	17.716	6.975	21.168	17.837	5.264	14	44.8915	5H6_21-23
whole	148.823	4.101	21.583	15.602	6.999	18.816	16.129	5.096	13	44.8915	5H6_21-23
whole	198.705	3.929	26.142	22.268	7.221	22.303	18.162	4.851		44.8915	5H6_21-23
whole	127.8	3.695	22.536	20.179	7.863			7.052		44.8915	5H6_21-23
whole	134.64	4.178	21.559	18.84	7.612	23.731	21.538	5.381	14	44.8915	5H6_21-23
whole	145.528	4.5	23.251	20.5	7.252	21.445	18.507	5.313		44.8915	5H6_21-23
whole	157.281	4.626	24.335	21.277	8.01			5.702	15	44.8915	5H6_21-23
whole	142.863	3.973	21.132	17.284	7.115	21.002	18.529	5.479	12	44.8915	5H6_21-23
whole	153.613	3.933	19.944	16.318	7.063	21.688	19.939	5.5	13	44.8915	5H6_21-23
whole	142.876	5.236	20.544	17.387	6.904			5.516	14	44.8915	5H6_21-23
whole	195.013	3.654	19.568	16.666	6.337	19.24	17.175	4.348	13	44.8915	5H6_21-23
whole	126.057	4.096	19.742	16.353	7.091	18.727	16.173	5.941	14	44.8915	5H6_21-23
whole	120.366	3.684	17.541	15.369	6.57	19.395	17.448	5.376	13	44.8915	5H6_21-23
whole	161.322	4.451	21.417	18.321	7.876	21.406	19.912	5.933	14	44.8915	5H6_21-23
whole	159.492	3.812	25	22.108	6.695	21.938	19.625	5.188		44.9965	5H6_32-34
whole	151.337	3.125	20.538	17.926	6.059	21.824	20.666	5.37		44.9965	5H6_32-34
whole	132.095	3.645	21.193	18.705	6.488	22.018	19.517	4.988	14	45.1215	5H6_45-47
whole	158.821	3.702	22.7	19.794	7.412	22.017	19.951	4.37	14	45.1215	5H6_45-47
whole	140.869	4.507	23.067	19.668	6.831	22.041	19.639	5.848	14	45.1215	5H6_45-47
whole	152.108	3.834	22.257	19.11	6.938	22.381	19.437	4.939		45.1215	5H6_45-47
whole	150.713	3.831	21.599	18.426	7.819	21.038	19.18	5.175	13	45.1215	5H6_45-47
whole	151.95	3.607	20.329	17.914	6.659	21.303	19.357	5.227		45.1215	5H6_45-47
whole	137.303	4.123	22.372	19.416	7.627	22.9	20.875	5.518	14	45.1215	5H6_45-47
whole	124.449	3.241	20.127	17.526	6.513	20.659	16.379	4.869	14	45.1215	5H6_45-47
whole	128.8	4.485	20.284	17.362	7.425	18.011	15.307	4.926	13	45.1215	5H6_45-47
whole	145.067	4.028	23.372	21.235	6.852	23.217	21.286	5.037	14	45.1885	5H6_52-54
whole	154.376	4.362	20.511	15.824	6.409	22.985	20.461	4.188		45.1885	5H6_52-54
whole	138.343	4.386	21.331	18.746	6.981	22.377	20.636	4.945	15	45.1885	5H6_52-54
whole	121.781	3.465	18.621	16.241	5.675	17.784	15.711	4.59	13	45.1885	5H6_52-54
whole	132.526	3.914	18.616	16.042	7.537	20.009	17.667	4.276	14	45.1885	5H6_52-54
whole	127.054	4.084	21.137	18.356	6.838	21.003	19.25	4.917		45.1885	5H6_52-54
whole	135.241	3.715			6.978	23.549	22.031	5.169		45.1885	5H6_52-54
whole	201.539	3.983	20.888	17.57	5.579	20.593	18.142	3.436		45.1885	5H6_52-54
whole	142.257	4.138	22.854	20.004	6.291	21.247	18.579	4.71	14	45.1885	5H6_52-54
whole	124.93	4.743	20.883	17.673	6.456	21.332	17.824	4.797	13	45.1885	5H6_52-54
whole	167.553	3.877	22.852	20.309	5.862	23.426	20.028	3.666	12	52.5775	6H7_32-34
whole	161.953	4.361	19.692	16.266	6.973	23.828	20.709	4.945		55.5905	6H7_42-44
diamond			21.735	18.42	6.156				13	44.9965	5H6_32-34
diamond			20.198	17.37	7.694					45.1215	5H6_45-47
diamond			19.158	16.754	6.76				12	45.1885	5H6_52-54
diamond			21.88	18.52	7.601					45.1885	5H6_52-54
diamond			19.563	16.371	5.089				13	52.5	6H4_112-114
diamond			19.402	17.399	7.289				14	52.5	6H4_112-114
diamond			19.406	14.767	6.156				12	52.5	6H4_112-114
diamond			20.623	19.016	5.653				13	52.5	6H4_112-114
diamond			20.712	17.655	6.872				13	52.5775	6H4_120-122
diamond			20.95	18.75	5.902					52.5775	6H4_120-122
diamond			21.086	17.664	6.364					52.5775	6H4_120-122
diamond			21.637	16.879	5.645				13	52.5775	6H4_120-122
diamond			18.935	14.427	5.975					52.5775	6H4_120-122
diamond			20.26	17.451	6.261				12	52.5775	6H4_120-122
diamond			18.449	16.81	5.687					52.5775	6H4_120-122
diamond			20.318	17.701	5.658					52.5775	6H4_120-122
diamond			20.009	17.787	6.195				14	52.5775	6H4_120-122
diamond			21.145	19.105	5.984					52.5775	6H4_120-122
diamond			18.125	15.716	5.878					52.5775	6H4_120-122
diamond			21.773	17.218	5.898					52.5775	6H4_120-122
diamond			22.389	19.112	6.075				13	52.5775	6H4_120-122
diamond			21.915	18.919	6.797				13	52.5775	6H4_120-122
diamond			21.929	18.968	6.779				13	52.5775	6H4_120-122
diamond			23.132	21.477	6.187					55.493	6H7_32-34
diamond			21.294	18.971	6.636					55.493	6H7_32-34
diamond			21.29	18.441	5.619					55.493	6H7_32-34
diamond			18.796	16.895	5.199				13	55.493	6H7_32-34
diamond			18.898	16.301	5.187				13	55.493	6H7_32-34
diamond			18.783	16.935	5.631				14	55.493	6H7_32-34
diamond			20.833	18.171	6.562					55.5905	6H7_42-44
diamond			19.554	15.871	5.77					55.5905	6H7_42-44
diamond			21.59	19.048	6.011					55.5905	6H7_42-44
diamond			18.943	16.378	6.064					55.6885	6H7_52-54
diamond			20.061	16.721	7.469					55.6885	6H7_52-54
diamond			20.179	16.687	6.227				13	55.6885	6H7_52-54
diamond			24.126	21.252	5.582				14	49.1805	6H7_72-74
diamond			22.03	18.547	6.551				14	49.1805	6H7_72-74
needle						24.161	21.721	5.308		39.9215	5H2_102-104
needle						22.275	19.33	5.018	13	39.9215	5H2_102-104
needle						21.392	19.267	6.017	14	39.9215	5H2_102-104
needle						23.175	18.925	5.627	14	44.7085	5H5_62-64
needle						22.681	20.441	4.614	13	44.7085	5H5_62-64
needle						20.44	17.542	4.07		44.9965	5H6_32-34
needle						25.815	23.016	4.322		52.5	6H4_112-114
needle						20.169	16.171	5.488		52.5775	6H4_120-122
needle						19.62	17.144	3.964	15	52.5775	6H4_120-122
needle						21.606	18.477	5.055	13	52.5775	6H4_120-122
needle						22.198	20.211	5.467		52.5775	6H4_120-122
needle						20.337	18.458	3.729	14	52.5775	6H4_120-122
needle						19.687	17.062	4.76	14	52.5775	6H4_120-122
needle						21.037	19.437	4.768		52.5775	6H4_120-122
needle						19.396	16.868	4.38	13	52.5775	6H4_120-122
needle						19.425	17.029	4.417		52.5775	6H4_120-122
needle						20.284	17.951	3.986	14	52.5775	6H4_120-122
needle						21.5	18.854	5.395		52.5775	6H4_120-122
needle						22.72	20.41	4.243		52.5775	6H4_120-122
needle						21.382	16.762	4.923		55.493	6H7_32-34
needle						24.391	20.215	3.778	14	55.493	6H7_32-34
needle						21.912	20.354	4.266		55.5905	6H7_42-44
needle						24.784	22.703	3.498		55.5905	6H7_42-44
needle						23.42	21.24	4.43		55.5905	6H7_42-44
needle						19.893	17.643	3.843		55.5905	6H7_42-44
needle						22.804	18.774	4.417		55.5905	6H7_42-44
needle						22.784	20.496	4.204		55.5905	6H7_42-44

## Sheet: F. clava morphometrics
Sample	length (µm)	head width (µm)	tail width (µm)	absolute proportional difference	costae per 10 µm	depth (CSF-B mbsf)	Sample ID
# of samples	99	113	100	99	110
average	47.77	9.86	6.94	0.29	7.94
minimum	31.14	8.06	4.71	0.13	6
maximum	65.48	11.72	10.22	0.43	12
whole	50.952	9.956	6.755	0.32	7	55.3	6H7_12-14
whole	41.789	8.589	7.28	0.15	8	55.3	6H7_12-14
whole	46.237	8.428	5.831	0.31	8	55.3	6H7_12-14
whole	49.199	10.165	6.644	0.35	9	55.3	6H7_12-14
whole	41.106	9.059	7.69	0.15	7	55.3	6H7_12-14
whole	37.714	8.151	5.891	0.28	9	55.3	6H7_12-14
whole	42.064	9.45	7.991	0.15	7	55.3	6H7_12-14
whole	42.015	9.66	7.633	0.21	7	55.3	6H7_12-14
whole	45.631	9.867	6.151	0.38	10	55.3	6H7_12-14
whole	51.911	9.602	6.147	0.36	8	55.3	6H7_12-14
whole	48.729	9.221	6.651	0.28	8	55.3	6H7_12-14
whole	41.306	9.637	6.587	0.32	9	55.3	6H7_12-14
whole	54.075	8.106	4.705	0.42	9	55.49	6H7_32-34
whole	55.439	9.393	5.871	0.37	8	55.49	6H7_32-34
whole	54.161	9.062	6.487	0.28	9	55.49	6H7_32-34
whole	37.584	8.584	6.417	0.25	8	55.49	6H7_32-34
whole	37.007	8.064	5.769	0.28	8	55.49	6H7_32-34
whole	39.819	9.077	5.78	0.36	8	55.49	6H7_32-34
whole	37.192	9.455	7.79	0.18	9	55.49	6H7_32-34
whole	42.422	9.521	7.251	0.24	8	55.49	6H7_32-34
whole	44.931	9.756	6.573	0.33	9	55.49	6H7_32-34
whole	42.178	9.953	7.405	0.26	10	55.49	6H7_32-34
whole	42.303	9.304	6.916	0.26	9	55.49	6H7_32-34
whole	37.58	9.823	7.567	0.23	7	55.49	6H7_32-34
whole	52.778	10.68	6.616	0.38	11	55.49	6H7_32-34
whole	46.887	8.404	5.724	0.32	8	55.49	6H7_32-34
whole	49.324	10.568	7.295	0.31	8	55.49	6H7_32-34
whole	43.02	9.315	6.174	0.34	6	55.49	6H7_32-34
whole	38.783	10.239	6.364	0.38		55.49	6H7_32-34
whole	42.128	10.112	7.923	0.22	7	55.49	6H7_32-34
whole	48.154	9.463	6.79	0.28	6	55.49	6H7_32-34
whole	37.901	9.901	7.601	0.23	8	55.49	6H7_32-34
whole	42.934	10.469	7.428	0.29	7	55.49	6H7_32-34
whole	53.495	10.171	7.737	0.24	7	55.49	6H7_32-34
whole	52.639	11.723	7.227	0.38	8	55.49	6H7_32-34
whole	39.601	10.462	7.184	0.31	8	55.49	6H7_32-34
whole	42.916	9.458	7.35	0.22	6	55.49	6H7_32-34
whole	44.575	10.022	7.12	0.29	7	55.49	6H7_32-34
whole	48.526	9.267	6.665	0.28	8	55.49	6H7_32-34
whole	59.751	10.884	6.185	0.43	8	55.49	6H7_32-34
whole	48.169	8.622	6.564	0.24	7	55.49	6H7_32-34
whole	54.734	9.281	5.649	0.39	9	55.49	6H7_32-34
whole	52.631	10.239	7.126	0.3	10	55.49	6H7_32-34
whole	51.169	10.078	6.727	0.33	9	55.49	6H7_32-34
whole	61.088	10.577	6.551	0.38	7	55.49	6H7_32-34
whole	59.227	11.3	7.401	0.35	7	55.49	6H7_32-34
whole	50.957	10.197	6.883	0.32	8	55.49	6H7_32-34
whole	64.082	11.328	7.642	0.33	6	55.49	6H7_32-34
whole	57.65	9.176	6.452	0.3	8	55.49	6H7_32-34
whole	51.014	9.964	7.231	0.27	8	55.49	6H7_32-34
whole	64.145	11.502	7.637	0.34	7	55.49	6H7_32-34
whole	57.3	9.475	6.136	0.35	7	55.49	6H7_32-34
whole	32.35	8.699	6.146	0.29	8	55.49	6H7_32-34
whole	35.443	9.056	6.754	0.25	7	55.49	6H7_32-34
whole	37.233	8.314	6.388	0.23	8	55.49	6H7_32-34
whole	46.231	9.914	7.046	0.29	8	55.49	6H7_32-34
whole	64.127	10.807	7.159	0.34	7	55.49	6H7_32-34
whole	31.136	9.353	6.971	0.25		55.49	6H7_32-34
whole	45.416	9.907	6.175	0.38	8	55.49	6H7_32-34
whole	53.56	10.097	6.643	0.34	8	55.49	6H7_32-34
whole	42.026	10.006	7.44	0.26	7	55.49	6H7_32-34
whole	55.266	11.126	7.649	0.31	9	55.49	6H7_32-34
whole	43.488	9.138	7.167	0.22	8	55.49	6H7_32-34
whole	57.764	9.867	6.438	0.35	8	55.49	6H7_32-34
whole	50.789	11.226	8.277	0.26	10	55.49	6H7_32-34
whole	35.031	8.58	6.783	0.21	8	55.49	6H7_32-34
whole	59.21	9.357	6.009	0.36	7	55.49	6H7_32-34
whole	47.685	8.855	5.824	0.34	8	55.49	6H7_32-34
whole	56.893	10.826	7.143	0.34	7	55.49	6H7_32-34
whole	32.786	9.399	7.156	0.24	8	55.49	6H7_32-34
whole	43.15	9.37	6.969	0.26	8	55.49	6H7_32-34
whole	48.37	8.519	7.081	0.17	7	55.59	6H7_42-44
whole	52.657	9.912	7.594	0.23	9	55.59	6H7_42-44
whole	44.017	9.202	7.074	0.23	8	55.59	6H7_42-44
whole	45.63	8.714	6.672	0.23	8	55.59	6H7_42-44
whole	46.368	9.167	5.5	0.4	7	55.59	6H7_42-44
whole	47.479	11.123	8.148	0.27	8	55.59	6H7_42-44
whole	44.327	9.158	5.329	0.42	7	55.59	6H7_42-44
whole	52.813	9.783	6.803	0.3	7	55.59	6H7_42-44
whole	43.213	8.793	6.49	0.26	7	55.59	6H7_42-44
whole	45.096	9.592	6.669	0.3	8	55.59	6H7_42-44
whole	33.585	9.156	7.957	0.13	9	55.59	6H7_42-44
whole	43.351	10.848	7.791	0.28	10	55.59	6H7_42-44
whole	45.395	10.499	7.543	0.28	8	55.59	6H7_42-44
whole	47.166	10.339	7.552	0.27	8	55.59	6H7_42-44
whole	43.357	8.597	5.667	0.34	8	55.59	6H7_42-44
whole	50.23	8.989	7.159	0.2	8	55.59	6H7_42-44
whole	47.115	10.414	8.036	0.23	11	55.59	6H7_42-44
whole	58.42	11.267	7.994	0.29	12	55.59	6H7_42-44
whole	40.038	9.605	8.045	0.16	7	55.59	6H7_42-44
whole	56.76	10.51	6.731	0.36	7	55.59	6H7_42-44
whole	56.862	11.49	7.504	0.35	6	55.59	6H7_42-44
whole	51.76	11.045	7.508	0.32	7	55.59	6H7_42-44
whole	64.309	11.228	7.071	0.37	9	55.59	6H7_42-44
whole	54.117	10.518	6.775	0.36	8	55.59	6H7_42-44
whole	52.346	10.809	8.241	0.24	8	55.59	6H7_42-44
whole	56.349	11.293	7.345	0.35	9	55.59	6H7_42-44
whole	65.48	10.768	6.93	0.36	7	55.59	6H7_42-44
whole	44.392	10.09	7.722	0.23	8	55.59	6H7_42-44
apical fragment			10.22		8		6H7_32-34
apical fragment		10.51			9		6H7_32-34
apical fragment		10.683			7		6H7_32-34
apical fragment		10.312			8		6H7_32-34
apical fragment		10.885			6		6H7_32-34
apical fragment		10.603					6H7_32-34
apical fragment		9.28			6		6H7_32-34
apical fragment		10.702					6H7_32-34
apical fragment		10.232			8		6H7_42-44
apical fragment		10.578			8		6H7_42-44
apical fragment		8.302			8		6H7_42-44
apical fragment		9.754			7		6H7_42-44
apical fragment		9.583			7		6H7_42-44
apical fragment		11.118			9		6H7_42-44
apical fragment		11.388			9		6H7_42-44

## Sheet: F. armandae morphometrics
Sample	length (µm)	head width (µm)	middle bulge width	tail width (µm)	tail to head ratio	absolute proportional diff.	# of costae per 10 µm	depth (CSF-B mbsf)	Sample id
# of samples	43	42	39	43	44	44	43
average	57.2671	9.35336	7.16297	3.59519	0.38889	0.61111	11.2326
minimum	32.751	8.085	5.207	2.234	0.246782	0.461289	10
maximum	86.396	10.399	8.585	5.156	0.538711	0.753218	13
whole	51.336	8.085	5.207	2.234	0.276314	0.723686	13	49.57	6H2_112-114
whole	32.751	8.803	7.024	3.869	0.439509	0.560491	11	49.375	6H2_92-94
whole	40.559	8.494	6.713	4.222	0.497057	0.502943	12	49.278	6H2_82-84
whole	40.137	9.44	7.485	4.05	0.429025	0.570975	12	49.1805	6H2_72-74
whole	41.904	9.169	7.376	4.52	0.492965	0.507035	11	49.083	6H2_62-64
whole	38.66	9.571	8.585	5.156	0.538711	0.461289	12	49.083	6H2_62-64
whole	42.758	9.427	7.784	4.184	0.443832	0.556168	11	49.083	6H2_62-64
whole	37.132	8.142	6.793	3.587	0.440555	0.559445	13	48.986	6H2_52_54
whole	39.166	8.753	7.494	4.32	0.493545	0.506455	12	48.986	6H2_52_54
whole	47.256	8.944	6.386	3.215	0.359459	0.640541	10	48.986	6H2_52_54
whole	58.277	9.735	7.22	3.171	0.325732	0.674268	11	48.8885	6H2_42-44
whole	71.385	9.271	6.558	3.268	0.352497	0.647503	10	48.8885	6H2_42-44
whole	51.701	8.518	7.094	2.993	0.351374	0.648626	10	48.791	6H2_32-34
whole	44.269	9.429	7.209	3.053	0.323788	0.676212	10	48.684	6H2_21-23
whole	56.182	10.078	6.924	3.32	0.32943	0.67057	10	48.684	6H2_21-23
whole	76.46	10.012	8.214	4.184	0.509374	0.490626	11	48.499	6H2_2-4
whole	43.483	9.169	7.442	3.882	0.521634	0.478366	12	48.499	6H2_2-4
whole	40.178	9.65	7.504	4.591	0.475751	0.524249	11	48.499	6H2_2-4
whole	38.771	9.399	7.885	4.047	0.430578	0.569422	12	48.499	6H2_2-4
whole	52.656	8.247		3.544	0.429732	0.570268	10	48.4015	6H1_142-144
whole	59.161	9.928	5.787	3.177	0.320004	0.679996	12	48.4015	6H1_142-144
whole	72.636		6.821	3.357			11	48.4015	6H1_142-144
whole	54.191	10.047	7.765	3.624	0.360705	0.639295	12	48.4015	6H1_142-144
whole	80.512	9.903	7.545	3.058	0.308795	0.691205	10	48.4015	6H1_142-144
whole	61.961	9.504	6.608	3.849	0.404987	0.595013	11	48.4015	6H1_142-144
whole	61.455	10.151	7.182	3.938	0.387942	0.612058	11	48.4015	6H1_142-144
whole	56.895	9.513	7.149	3.609	0.379376	0.620624	11	48.4015	6H1_142-144
whole	52.9	10.298	7.381	4.158	0.403768	0.596232	12	48.4015	6H1_142-144
whole	67.694	8.652	6.215	3.008	0.347665	0.652335	10	48.4015	6H1_142-144
whole	65.52	9.235	7.566	3.596	0.389388	0.610612	12	48.4015	6H1_142-144
whole	77.739	9.409	7.513	3.603	0.382931	0.617069	11	48.3035	6H1_132-134
whole	45.983	9.102	7.876	4.043	0.444188	0.555812	11	48.3035	6H1_132-134
whole	61.491	9.246	7.047	3.08	0.333117	0.666883	10	48.3035	6H1_132-134
whole	70.625	10.098	7.884	2.492	0.246782	0.753218	13	48.3035	6H1_132-134
whole	78.571	10.399	7.259	3.669	0.352822	0.647178	12	48.3035	6H1_132-134
whole	86.396	9.1	7.429	3.54	0.389011	0.610989	12	47.1275	6H1_12-14
whole	74.179	9.079	7.213	3.914	0.431105	0.568895	11	47.1275	6H1_12-14
whole	63.123	9.95	6.658	3.22	0.323618	0.676382	11	47.1275	6H1_12-14
whole	80.29	9.443	6.775	2.497	0.264429	0.735571	11	47.1275	6H1_12-14
whole	65.747	10.312	6.786	3.702	0.358999	0.641001	12	47.1275	6H1_12-14
whole	66.963	9.003		3.237	0.359547	0.640453	11	48.499	6H2_2-4
whole	59.243	9.548		4.172	0.43695	0.56305	10	48.499	6H2_2-4
whole	54.188	8.585		2.64	0.307513	0.692487	12	51.614	6H4_21-23
apical fragement		9.641	6.957	3.294	0.341666	0.658334	11	47.1275	6H1_12-14
apical fragement		8.774	6.915				11	47.1275	6H1_12-14
apical fragement		10.025	8.158				11	48.3035	6H1_132-134
apical fragement		9.808	7.49				12	48.3035	6H1_132-134
apical fragement		9.279	6.587				10	48.4015	6H1_142-144
apical fragement		9.729	7.047				10	48.4015	6H1_142-144
apical fragement		10.019	7.396	3.757	0.374988	0.625012	11	48.4015	6H1_142-144
apical fragement		8.822	7.25				12	48.4015	6H1_142-144
apical fragement		9.632					11	48.499	6H2_2-4
apical fragement		9.182	6.831				12	48.499	6H2_2-4
apical fragement		9.589	7.403				10	48.499	6H2_2-4
apical fragement		9.827					10	48.499	6H2_2-4
apical fragement		8.501	6.593				11	48.499	6H2_2-4
apical fragement		9.408					10	48.499	6H2_2-4
apical fragement		10.701					11	48.499	6H2_2-4
apical fragement		9.499					10	48.499	6H2_2-4
apical fragement		9.826	7.489				11	48.8885	6H2_42-44
apical fragement		10.1	7.526				10	49.278	6H2_82-84
apical fragement		8.397					11	49.278	6H2_82-84
